# Supplementary material for: Genetic Linkage Mapping of Economically Important Traits in Cultivated Tetraploid Potato (Solanum tuberosum L.)
Source: Oxford University Press journal article supplement (doi:10.1534/g3.115.019646), 2015-09-16
Supplement: 019646_019646si.pdf [file 019646_019646si.pdf]

**Genetic Linkage Mapping of Economically Important Traits in Cultivated Tetraploid Potato (*Solanum tuberosum* L.)**

Alicia N. Massa\*, Norma C. Manrique-Carpintero\*, Joseph J. Coombs\*, Daniel G. Zarka\*, Anne E. Boone\*, William W. Kirk\*, Christine A. Hackett‡, Glenn J. Bryan§, and David S. Douches\*,<sup>1</sup>

\*Department of Plant, Soil and Microbial Sciences, Michigan State University, East Lansing, Michigan 48824

‡Biomathematics and Statistics Scotland, Invergowrie, Dundee, DD2 5DA, UK

§The James Hutton Institute, Invergowrie, Dundee, DD2 5DA, UK

<sup>1</sup>Corresponding author: Department of Plant, Soil and Microbial Sciences, Michigan State University, East Lansing, MI 48824. E-mail: [douchesd@msu.edu](mailto:douchesd@msu.edu)

**DOI: 10.1534/g3.115.019646**

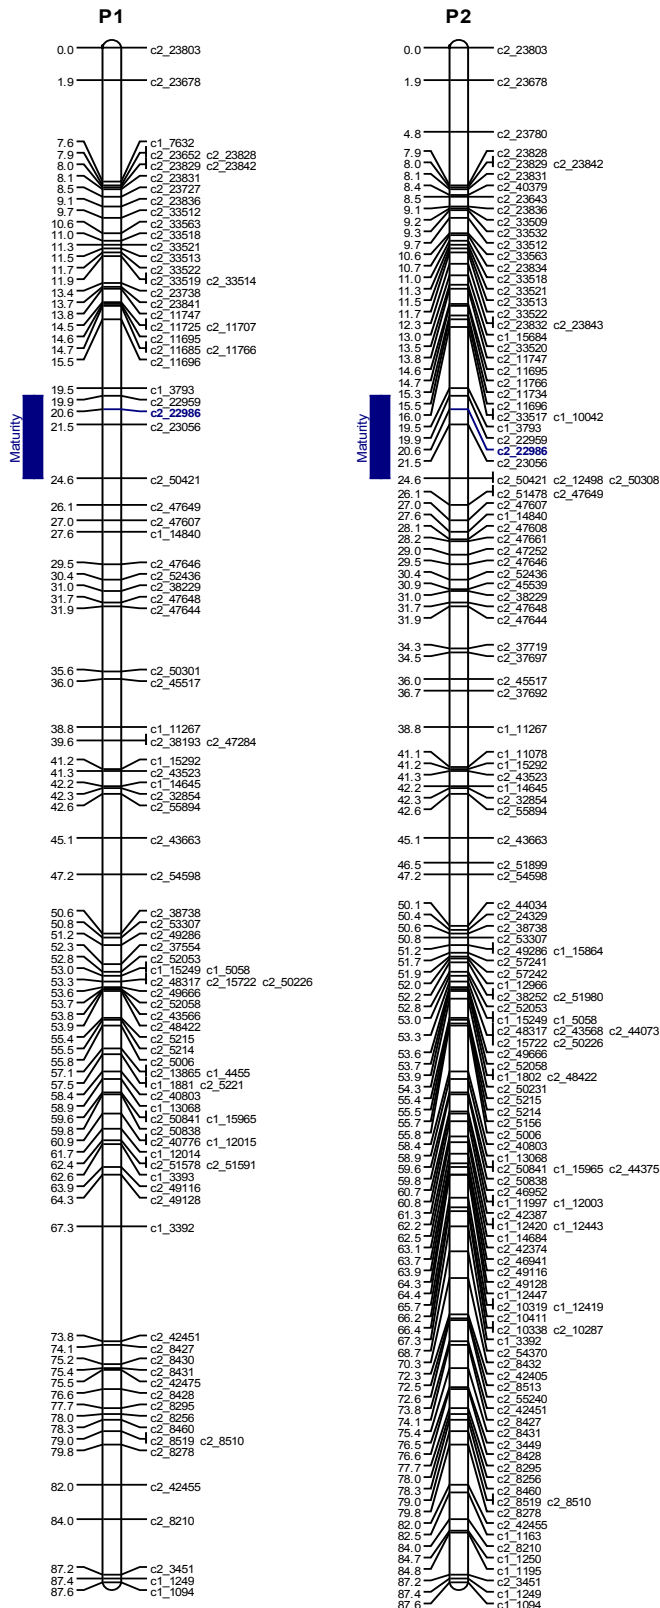

**Figure S1** Linkage maps of “Jacqueline Lee” (P1) and “MSG227-2” (P2) chromosome 5.

The blue bar corresponds to the two-LOD support interval for the QTL location.

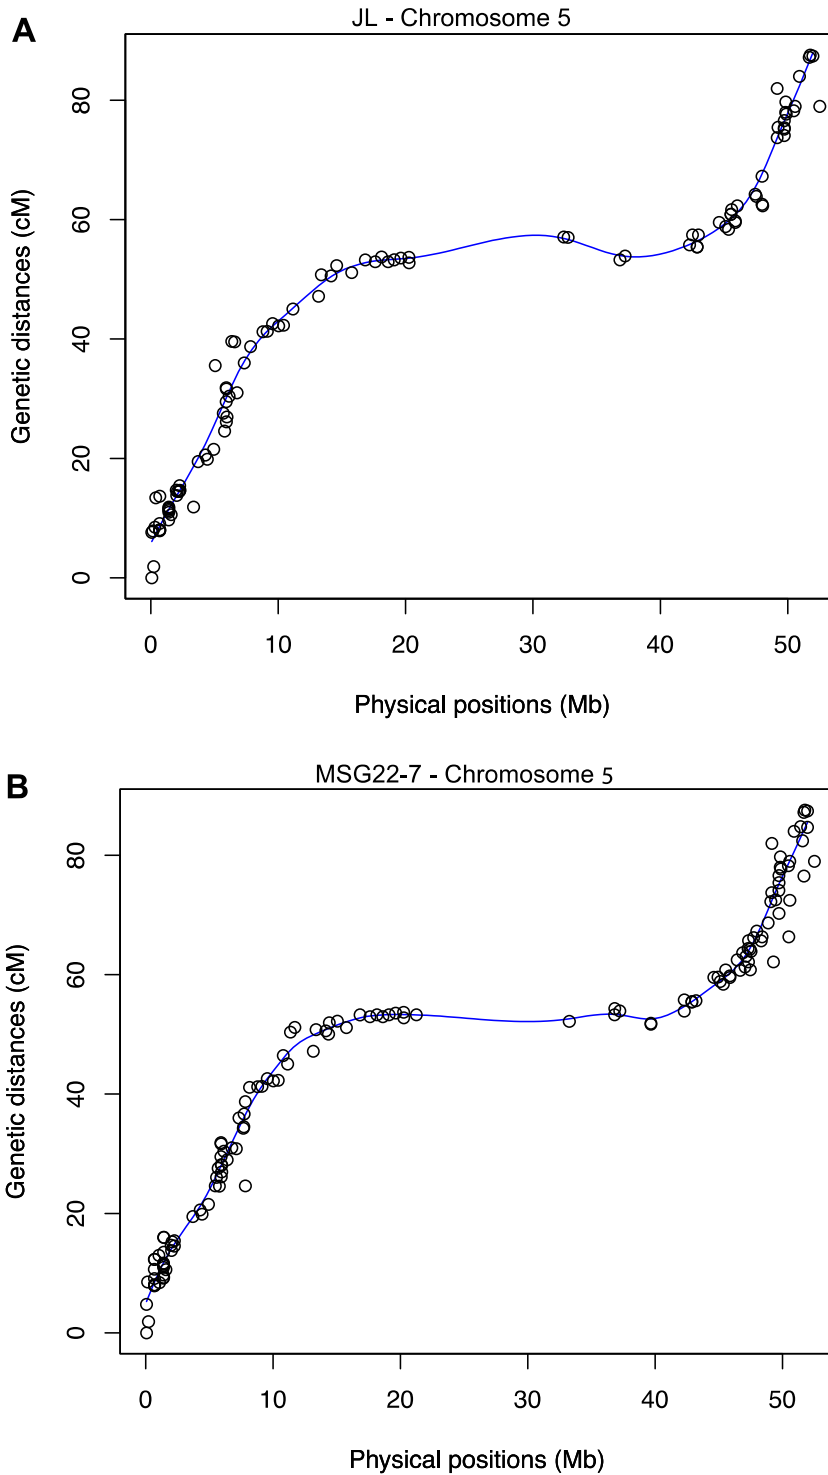

**Figure S2** Graph of chromosome 5 showing the genetic location (cM) and the physical position (Mb) of SNP markers. A: “Jacqueline Lee” (JL), 104 markers. B: “MSG227-2”, 140 markers.

**Table S1** Genotype scores of the Infinium 8303 Potato Array SNP markers (AAAA=0, AAAB=1, AABB=2, ABBB=3, BBBB=4, and missing value=.) evaluated in the MSL603 population.

**Available for download as a .txt file at**  
**[www.g3journal.org/lookup/suppl/doi:10.1534/g3.115.019646/-/DC1](http://www.g3journal.org/lookup/suppl/doi:10.1534/g3.115.019646/-/DC1)**

**Table S2 Parent and F1 offspring genotype configurations in the MSL603 tetraploid mapping population.**

| No.<br>Clusters | Parental genotype<br>configurations |      | Type             | Counts      |
|-----------------|-------------------------------------|------|------------------|-------------|
| 2               | AAAA                                | AAAB | Simplex          | 351         |
|                 | BBBB                                | ABBB | Simplex          | 352         |
|                 | AAAA                                | ABBB | Triplex          | 36          |
|                 | AAAB                                | BBBB | Triplex          | 28          |
| 3               | AAAA                                | AABB | Duplex           | 124         |
|                 | AABB                                | BBBB | Duplex           | 149         |
|                 | AAAB                                | AAAB | Double-simplex   | 143         |
|                 | ABBB                                | ABBB | Double-simplex   | 159         |
|                 | AAAB                                | ABBB | X-double-simplex | 59          |
| 4               | AAAB                                | AABB | Simplex-duplex   | 182         |
|                 | AABB                                | ABBB | Duplex-simplex   | 254         |
| 5               | AABB                                | AABB | Double-duplex    | 135         |
| <b>Total</b>    |                                     |      |                  | <b>1972</b> |

**Tables S3-S4**

Available for download as .txt files at  
[www.g3journal.org/lookup/suppl/doi:10.1534/g3.115.019646/-/DC1](http://www.g3journal.org/lookup/suppl/doi:10.1534/g3.115.019646/-/DC1)

**Table S3.** Order of the mapped SNPs on chromosomes 1-12. SNPs positions are marked with JL (from Jacqueline Lee), G227-2 (from MSG227-2), and blank (from both parents).

**Table S4.** Parents and population late blight (RAUDPC) and maturity (MAT) raw/clonal phenotypic trait data.
