# Supplementary material for: Genetic Linkage Mapping of Economically Important Traits in Cultivated Tetraploid Potato (Solanum tuberosum L.)
Source: Oxford University Press journal article supplement (doi:10.1534/g3.115.019646), 2015-09-16
Supplement: 019646_figures1.pdf [file 019646_figures1.pdf]

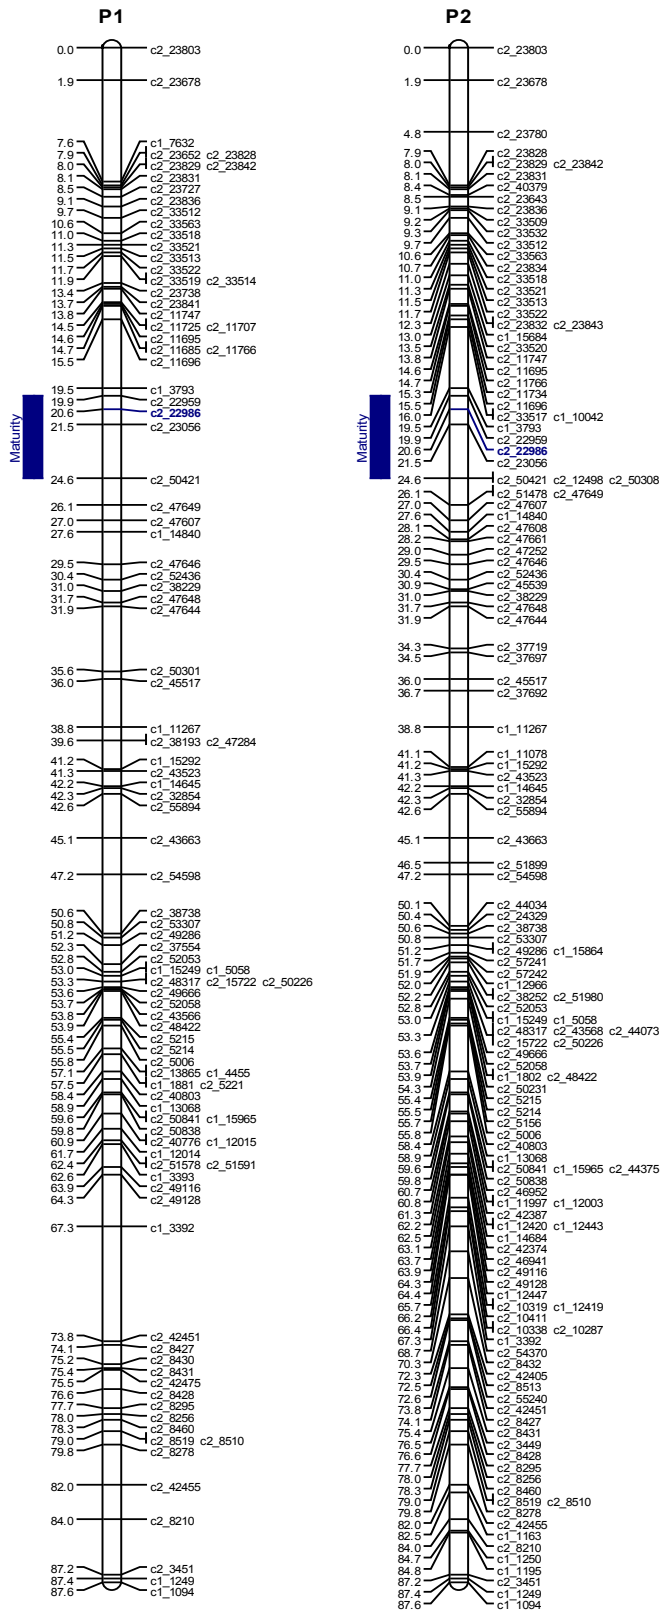

**Figure S1** Linkage maps of “Jacqueline Lee” (P1) and “MSG227-2” (P2) chromosome 5.

The blue bar corresponds to the two-LOD support interval for the QTL location.
