# Supplementary material for: Genetic Linkage Mapping of Economically Important Traits in Cultivated Tetraploid Potato (Solanum tuberosum L.)
Source: Oxford University Press journal article supplement (doi:10.1534/g3.115.019646), 2015-09-16
Supplement: 019646_figures2.pdf [file 019646_figures2.pdf]

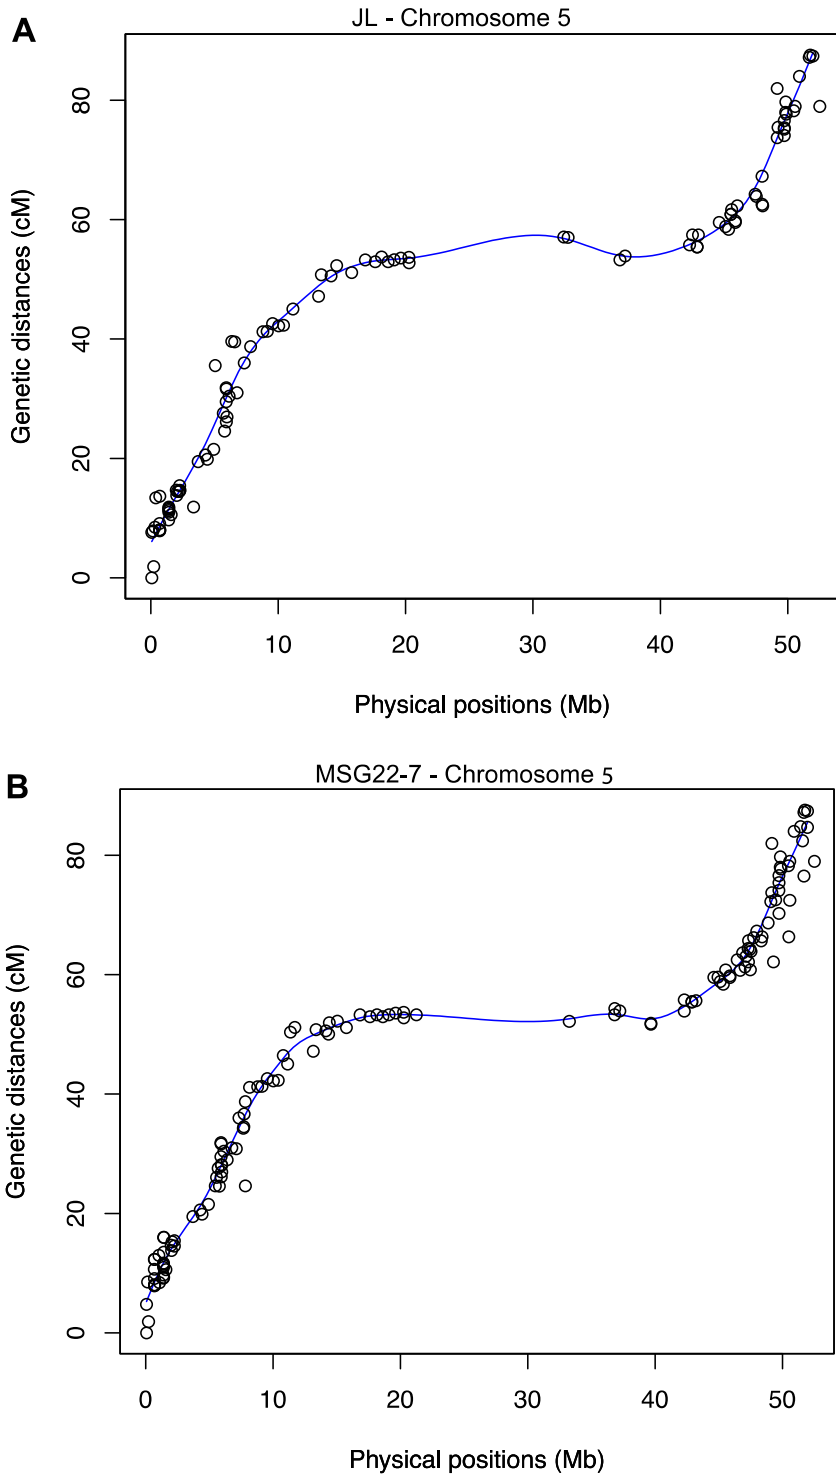

**Figure S2** Graph of chromosome 5 showing the genetic location (cM) and the physical position (Mb) of SNP markers. A: “Jacqueline Lee” (JL), 104 markers. B: “MSG227-2”, 140 markers.
