# Supplementary material for: Genetic Linkage Mapping of Economically Important Traits in Cultivated Tetraploid Potato (Solanum tuberosum L.)
Source: Oxford University Press journal article supplement (doi:10.1534/g3.115.019646), 2015-09-16
Supplement: 019646_tables2.pdf [file 019646_tables2.pdf]

**Table S2 Parent and F1 offspring genotype configurations in the MSL603 tetraploid mapping population.**

| No.<br>Clusters | Parental genotype<br>configurations |      | Type             | Counts      |
|-----------------|-------------------------------------|------|------------------|-------------|
| 2               | AAAA                                | AAAB | Simplex          | 351         |
|                 | BBBB                                | ABBB | Simplex          | 352         |
|                 | AAAA                                | ABBB | Triplex          | 36          |
|                 | AAAB                                | BBBB | Triplex          | 28          |
| 3               | AAAA                                | AABB | Duplex           | 124         |
|                 | AABB                                | BBBB | Duplex           | 149         |
|                 | AAAB                                | AAAB | Double-simplex   | 143         |
|                 | ABBB                                | ABBB | Double-simplex   | 159         |
|                 | AAAB                                | ABBB | X-double-simplex | 59          |
| 4               | AAAB                                | AABB | Simplex-duplex   | 182         |
|                 | AABB                                | ABBB | Duplex-simplex   | 254         |
| 5               | AABB                                | AABB | Double-duplex    | 135         |
| <b>Total</b>    |                                     |      |                  | <b>1972</b> |
